# On Affine Fibrations

S.M. Bhatwadekar and Amartya Kumar Dutta  
*School of Mathematics, Tata Institute of Fundamental Research,  
Homi Bhabha Road, Bombay 400 005, India  
e-mail: smb@tifrvax.bitnet and dutta@tifrvax.bitnet*

## Abstract

In this survey article we highlight some recent developments in the problems on affine fibrations. We show how some recent results completely determine the structure of an  $A^1$  fibration over a seminormal ring and how they can be used to prove a generalised epimorphism theorem. We also show how the problem of  $A^2$  fibration over a two-dimensional regular local ring is related to the problem of embedding of a plane in affine 3-space over a discrete valuation ring.

## 1 Introduction

For a commutative local ring  $S$  and an  $S$ -algebra  $A$ , it is useful to know in affine algebraic geometry, sufficient criteria for deciding whether  $A$  is a polynomial ring in  $n$  variables over  $S$ . The following conditions are obviously necessary :

- (i)  $A$  is a finitely generated flat  $S$ -algebra.

- (ii) For every prime ideal  $P$  of  $S$ ,  $A_P/PA_P$  is a polynomial ring in  $n$  variables over  $S_P/PS_P$ .
- (iii)  $\Omega_{A/S}$  is a free  $A$ -module of rank  $n$ .

One would like to know when these conditions are sufficient. In this article we make a brief survey of recent developments in this direction.

We first recall some standard notations to be used throughout the article. For a commutative ring  $S$ ,  $S^{[n]}$  denotes a polynomial ring in  $n$  variables over  $S$ . For a prime ideal  $P$  of  $S$ ,  $k(P)$  denotes the field  $S_P/PS_P$ . For an  $S$ -algebra  $A$ ,  $\Omega_{A/S}$  is the module of Kahler differentials of  $A$  over  $S$ .

## 2 General affine fibrations

**Definition 2.1.** For a commutative ring  $S$ , an  $S$ -algebra  $A$  is said to be an affine  $n$ -fibration over  $S$  (denoted by  $\mathbf{A}^n$ ), if the following conditions hold:

- (i)  $A$  is a finitely generated flat  $S$ -algebra.
- (ii) For every prime ideal  $P$  of  $S$ ,  $A \otimes_S k(P) = k(P)^{[n]}$ .

**Example 2.2.** For a ring  $S$ , let  $B = S^{[\ell]}$ ,  $M$  a projective module of rank  $m$  over  $B$  and let  $A = \text{Sym}_B(M)$ . Let  $n = \ell + m$ . By the Quillen - Suslin theorem ([13, Theorem 3] and [18, Theorem 1]) any projective module over  $k(P)^{[\ell]}$  is free and hence it is easy to see that  $A$  is an  $\mathbf{A}^n$ -fibration over  $S$ .

The following remarkable theorem of T.Asanuma gives a complete structure theorem for an  $\mathbf{A}^n$ -fibration over a noetherian ring  $S$  ([2, Theorem 3.4).

**Theorem 2.3.** *Let  $S$  be a noetherian ring and  $A$  an  $\mathbf{A}^n$ -fibration over  $S$ . Then  $\Omega_{A/S}$  is a projective  $A$ -module of rank  $n$  and  $A$  is (upto an isomorphism) an  $S$ -subalgebra of a polynomial ring  $S^{[m]}$  for some  $m$  such that*

$$A^{[m]} \cong \text{Sym}_{S^{[m]}}(\Omega_{A/S} \otimes_A S^{[m]}).$$

*If moreover  $\Omega_{A/S}$  is a free  $A$ -module (of rank  $n$ ) then  $A^{[m]} = S^{[m+n]}$ .*

The general question of when an  $\mathbf{A}^n$ -fibration is an affine  $\mathbf{A}^n$ -bundle (i.e., locally a polynomial ring in  $n$  variables) was first raised by I.V. Dolgachev and B.Weisfeiler ([9]). As a consequence of Asanuma's theorem it follows ([2], 3.5.) :

**Corollary 2.4.** *Let  $S$  be a regular local ring. Then an  $\mathbf{A}^n$  fibration  $A$  over  $S$  is at least a stably polynomial algebra over  $S$ , i.e.,  $A^{[t]} = S^{[n+t]}$  for some integer  $t \geq 0$ .*

However, if  $S$  is not a regular local ring, then an  $\mathbf{A}^n$ -fibration over  $S$  need not be a stably polynomial algebra over  $S$  as the following examples illustrate :

**Example 2.5.** ([20, 4.1]). Let  $k$  be a field of characteristic zero. Let  $S = k[[t^2, t^3]]$  and  $A = S[X + tX^2] + (t^2, t^3)S[X]$ . Then one can check that  $A$  is an  $\mathbf{A}^1$ -fibration over  $S$  but  $A$  is not a stably polynomial algebra over  $S$ .

**Example 2.6.** Let  $k$  be a field,  $S = k[[t^2, t^3]]$ ,  $I = (1 - t^2 X^2, t^2 - t^3 X)S[X]$ . One can check that  $I$  is a projective  $S[X]$ -module of rank 1 which is not free. Let  $A = \text{Sym}_{S[X]}(I)$ . Then  $A$  is an  $\mathbf{A}^2$ -fibration over  $S$ . But  $A$  is not a stably polynomial algebra over  $S$ .

**Example 2.7.** Let  $S = \mathbf{C}[X, Y, Z]_{(X, Y, Z)} / (X^4 + Y^4 + Z^4)$ . Then  $S$  is a normal local domain of dim 2. V. Srinivas has shown ([17, Sect. 3]) that there exists a projective module  $P$  of rank 2 over  $S[X]$  which is not stably free. Let  $A = \text{Sym}_{S[X]}(P)$ . Then  $A$  is an  $\mathbf{A}^3$ -fibration over  $S$  which is not a stably polynomial algebra over  $S$ .

### 3 $\mathbf{A}^1$ -fibration

We now discuss in detail the problem of  $\mathbf{A}^1$ -fibration. We first mention two results of E. Hamann ([10, Theorems 2.6 and 2.8]) and R.G.Swan ([19, Theorem 6.1]) respectively.

**Theorem 3.1.** *If  $S_{\text{red}}$  is a noetherian seminormal ring or if  $S$  contains the field of rationals, then  $S^{[1]}$  is  $S$ -invariant (i.e., if  $S \subseteq A$  and  $A^{[m]} = S^{[m+1]}$ , then  $A = S^{[1]}$ ).*

**Theorem 3.2.** *If  $S_{\text{red}}$  is a seminormal ring, then  $\text{Pic}(S^{[m]}) = \text{Pic}(S)$  for all  $m \geq 1$ .*

From the theorems (2.3), (3.1) and (3.2) it is easy to deduce

**Theorem 3.3.** *Let  $S$  be a noetherian local ring such that  $S_{\text{red}}$  is seminormal. Let  $A$  be an  $\mathbf{A}^1$ -fibration over  $S$ . Then  $A = S^{[1]}$ .*

Thus using a result of Bass-Connell-Wright (see (4.7)) one concludes that if  $A$  is an  $\mathbf{A}^1$ -fibration over a noetherian seminormal ring  $S$ , then  $A \cong \text{Sym}_S(P)$  for a projective  $S$ -module  $P$  of rank 1.

On the other hand, if  $S_{\text{red}}$  is not seminormal then J. Yanik's example (2.5) shows that an  $\mathbf{A}^1$ -fibration  $A$  over  $S$  need not be even a stably polynomial algebra over  $S$ . However if  $\Omega_{A/S}$  is free then by (2.3),  $A^{[m]} = S^{[m+1]}$ . Therefore using (3.1) we have

**Theorem 3.4.** *Let  $S$  be a noetherian ring such that either  $S$  contains the field of rationals or  $S_{\text{red}}$  is seminormal. Let  $A$  be an  $\mathbf{A}^1$ -fibration over  $S$  such that  $\Omega_{A/S}$  is a free  $A$ -module. Then  $A = S^{[1]}$ .*

The necessity of the condition on  $\Omega_{A/S}$  has been illustrated by example (2.5). E. Hamann has given an example in ([10]) to illustrate the necessity of the condition on  $S$ . We give below a similar example.

**Example 3.5.** Let  $R = \mathbf{Z}_{(2)}[2\sqrt{2}]$ ,  $A = R[X, Y]$ ,  $S = R[F]$  where

$$F = X - 2Y(\sqrt{2}X - Y^2) + \sqrt{2}(\sqrt{2}X - Y^2)^2 - \sqrt{2}(Y - \sqrt{2}(\sqrt{2}X - Y^2))^4.$$

It has been shown in ([6], 4.1) that  $A$  is an  $\mathbf{A}^1$ -fibration over  $S$  and  $\Omega_{A/S}$  is free but  $A \neq S^{[1]}$  (in fact  $R[X, Y]/(F) \neq R^{[1]}$ ).

In the context of the above example we remark that in ([6], Theorem 3.1)

it was shown that for any noetherian ring  $R$  and an element  $F \in R[X, Y]$  which is algebraically independent over  $R$ ,  $R[X, Y]$  is an  $\mathbf{A}^1$ -fibration over  $R[F]$  if and only if  $R[X, Y]$  is a stably polynomial algebra over  $R[F]$ . Also in view of Example (3.5) one may ask the following question :

**Question 3.6.** Let  $R$  be a noetherian domain. Let  $F \in R[X, Y]$  be such that  $R[X, Y]$  is an  $\mathbf{A}^1$ -fibration over  $R[F]$  and  $R[X, Y]/(F) = R^{[1]}$ . Then is  $R[X, Y] = R[F]^{[1]}$  ?

In connection with Question (3.6) we mention the following result of the first author ([5]).

**Proposition 3.7.** For any commutative domain  $R$  of characteristic zero, if  $F \in R[X, Y]$  is such that  $R[X, Y]/(F) = R^{[1]}$ , then  $R[X, Y]$  is an  $\mathbf{A}^1$ -fibration over  $R[F]$  and  $\Omega_{R[X, Y]/R[F]}$  is a free  $R[X, Y]$ -module.

Applying the results (2.3), (3.1) and (3.7) the following generalisation of the famous Abhyankar-Moh epimorphism theorem ([1, Theorem 1.2]) was obtained in ([5, Theorems 3.7 and 3.9]).

**Theorem 3.8.** For a commutative domain of characteristic zero which is either seminormal or contains a field,  $R[X, Y]/(F) = R^{[1]}$  implies that  $R[X, Y] = R[F]^{[1]}$ .

In view of Asanuma's result that any  $\mathbf{A}^1$ -fibration over a noetherian ring  $S$  is contained in a polynomial ring  $S^{[m]}$  for some  $m$ , one would like to know under what conditions an  $S$ -subalgebra of  $S^{[m]}$  is an  $\mathbf{A}^1$ -fibration over  $S$ .

Recently the authors investigated the problem and the following results were obtained in ([8]).

**Theorem 3.9.** *Let  $S$  be a noetherian ring and  $A$  an  $S$ -subalgebra of  $S^{[m]}$  such that*

(i)  *$A$  is  $S$ -flat.*

(ii)  *$A \otimes_S k(P)$  are factorial domains for all prime ideals  $P$  of  $S$  and  $\dim(A \otimes_S k(P)) = 1$  for all minimal prime ideals  $P$  of  $S$ .*

*Then  $A$  is an  $A^1$ -fibration over  $S$ .*

**Theorem 3.10.** *Let  $S$  be a noetherian ring containing a field of characteristic zero and  $A$  an  $S$ -subalgebra of  $S^{[m]}$  such that*

(i)  *$A$  is  $S$ -flat.*

(ii)  *$A \otimes_S k(P)$  are 1-dimensional normal domains for all minimal prime ideals  $P$  of  $S$ .*

(iii)  *$A \otimes_S k(P)$  are integral domains for all prime ideals  $P$  of height 1 in  $S$ .*

*Then  $A$  is an  $A^1$ -fibration over  $S$ .*

Consequently, under the hypotheses of either (3.9) or (3.10), and the further assumption that  $S_{red}$  is seminormal, using the results (2.3), (3.1), (3.2) and a theorem of Bass - Connell - Wright (see (4.7) below), one concludes

that  $A \cong \text{Sym}_S(M)$  where  $M$  is a projective  $S$ -module of rank 1. Examples have also been given in ([8]) to show that the conditions in (3.9) and (3.10) are necessary.

## 4 $\mathbf{A}^2$ -fibration

We now discuss problems in  $\mathbf{A}^2$ -fibration. In general an  $\mathbf{A}^2$ -fibration over a noetherian ring  $S$  need not be even a stably polynomial algebra over  $S$  as Example (2.6) showed. However, if  $S$  is a regular local ring then by Asanuma's result (2.4), if  $A$  is an  $\mathbf{A}^2$ -fibration over  $S$  then at least  $A^{[m]} = S^{[m+2]}$  for some integer  $m \geq 0$ . One would like to know if  $A = S^{[2]}$ .

In this direction, A.Sathaye first proved the following beautiful theorem over a discrete valuation ring  $S$ . ([16, Theorem 1]) :

**Theorem 4.1.** *Let  $S$  be a discrete valuation ring containing a field of characteristic zero. Let  $A$  be an  $\mathbf{A}^2$ -fibration over  $S$ . Then  $A = S^{[2]}$ .*

(Asanuma has shown in ([2, Theorem 3.1]) that it is not necessary to assume that  $A$  is finitely generated over  $S$ ).

Asanuma has also given the following example in ([2, 5.1]) to show that it is necessary to assume in (4.1) that  $S$  contains a field of characteristic zero.



**Example 4.2.** Let  $S = \mathbf{Z}_{(p)}$  for some prime integer  $p$ . Let

$$A = \mathbf{Z}_{(p)}[X, Y, Z]/(pZ - Y - Y^{pq} + X^{p^2})$$

where  $q$  is an integer  $\geq 2$  and  $(p, q) = 1$ . Then  $A$  is an  $\mathbf{A}^2$ -fibration over  $S$ . But  $A \neq \mathbf{Z}_{(p)}^{[2]}$ .

One would now like to know whether an  $\mathbf{A}^2$ -fibration over a regular local ring  $S$  of dimension  $\geq 2$  is necessarily  $S^{[2]}$ . In view of Example (4.2) one of course has to assume that  $S$  contains the field of rationals. The problem is still open. As a starting point we ask the following question :

**Question 4.3.** Let  $k$  be a field of characteristic zero. Let  $S$  be a regular two-dimensional affine  $k$ -spot (i.e., localisation of a regular affine  $k$ -algebra at a prime ideal). Let  $A$  be an  $\mathbf{A}^2$ -fibration over  $S$ . Then is  $A = S^{[2]}$  ?

In ([12]) M.P. Murthy has shown that *if  $S$  is a regular local ring of dim 2, then any projective module over  $S^{[m]}$  is free*. Thus it follows from Asanuma's result (2.3) that in the situation of (4.3),  $\Omega_{A/S}$  is a free  $A$ -module of rank 2.

We now show how Question (4.3) is connected with the following epimorphism problem over a discrete valuation ring :

**Question 4.4.** Let  $R$  be a discrete valuation ring containing a field of characteristic zero. Let  $F \in R[X, Y, Z]$  be such that  $R[X, Y, Z]/(F) = R^{[2]}$ . Then is  $R[X, Y, Z] = R[F]^{[2]}$  ?

We first state certain well-known results. The following result is due to

H.Lindel ([11]) :

**Theorem 4.5.** *Let  $k$  be a perfect field. Let  $S$  be a regular  $k$ -spot of dimension  $n$ . Then there exists a field  $L$  such that  $k \hookrightarrow L \hookrightarrow S$  and an affine  $L$ -algebra  $B$  with maximal ideal  $M$  such that  $S = B_M$  and  $B/MB$  is a finite separable extension of  $L$ . Moreover there exists a subring  $S_1$  of  $S$  of the form  $S_1 = L[X_1, \dots, X_n]_{(X_1, \dots, X_{n-1}, \phi(X_n))}$  and an element  $t \in S_1$  such that the canonical map  $S_1/tS_1 \rightarrow S/tS$  is an isomorphism (where  $\phi$  is the irreducible polynomial of the simple field extension  $B/MB$  of  $L$ ).*

The following result of the first author can be proved using ideas in ([4]).

**Lemma 4.6.** *Let  $R \hookrightarrow S$  be noetherian domains such that  $R$  and  $S$  are analytically isomorphic along  $t \in R$  (i.e., the canonical map  $R/tR \rightarrow S/tS$  is an isomorphism). Given a finitely generated flat  $S$ -algebra  $A$  such that  $A_t = S_t^{[n]}$ , there exists a finitely generated flat  $R$ -algebra  $D$  such that  $D_t = R_t^{[n]}$ ,  $A \cong D \otimes_R S$  and  $A/tA \cong D/tD$ . If  $A$  is an  $A^n$ -fibration over  $S$ , then  $D$  is an  $A^n$ -fibration over  $R$ .*

Next we state a patching up theorem of Bass - Connell - Wright ([3, Theorem 4.4]) :

**Theorem 4.7.** *Let  $A$  be a finitely presented  $S$ -algebra. Suppose that for all maximal ideals  $M$  of  $S$ , the  $S_M$ -algebra  $A_M$  is isomorphic to the symmetric algebra of some  $S_M$ -module. Then  $A \cong \text{Sym}_S(P)$  for a finitely presented  $S$ -module  $P$ .*

As a consequence of (4.1) and (4.7) and the fact that any projective module over a P.I.D is free, it is easy to see

**Corollary 4.8.** *Let  $S$  be a P.I.D. containing a field of characteristic zero. Let  $A$  be an  $\mathbf{A}^2$ -fibration over  $S$ . Then  $A = S^{[2]}$ .*

We now resume our discussion of Question (4.3). Recall that  $k$  is a field of characteristic zero,  $S$  a regular affine  $k$ -spot of dimension 2 and  $A$  an  $\mathbf{A}^2$ -fibration over  $S$ . Then by (4.5) there exists a field  $L$  in  $S$  containing  $k$ , an affine  $L$ -algebra  $B$  and a maximal ideal  $M$  of  $B$  such that  $S = B_M$  and  $B/MB$  is a finite separable extension of  $L$ . Also there exists a subring  $S_1$  of  $S$  and an element  $t \in S_1$  such that

$$(i) S_1 = L[U, V]_{(U, \phi(V))} \text{ where } B/MB = L[T]/(\phi(T)) .$$

$$(ii) S_1/tS_1 \overset{\sim}{\simeq} S/tS .$$

Now it is easy to see that  $S_t$  is a P.I.D. and  $A_t$  an  $\mathbf{A}^2$ -fibration over  $S_t$ . Thus by (4.8),  $A_t = S_t^{[2]}$ . Using (i) and (ii) above and applying (4.6), there exists a finitely generated flat algebra  $A_1$  over  $S_1$  such that  $A_1[1/t] = S_1[1/t]^{[2]}$ ,  $A \cong A_1 \otimes_{S_1} S$ ,  $A_1/tA_1 \cong A/tA$  and  $A_1$  is an  $\mathbf{A}^2$ -fibration over  $S_1$ .

Let  $R = L[V]_{(\phi(V))}$ . This is a discrete valuation ring with parameter  $\pi$ , say. Now  $R[U] \hookrightarrow S_1$  and  $R[U]/(U) \overset{\sim}{\simeq} S_1/(U)S_1$ . Now  $S_1[1/U]$  is clearly a P.I.D. and  $A_1$  being an  $\mathbf{A}^2$ -fibration over  $S_1$ ,  $A_1[1/U]$  is also an  $\mathbf{A}^2$ -fibration over  $S_1[1/U]$ . Again applying (4.8),  $A_1[1/U] = S_1[1/U]^{[2]}$ . Therefore, by (4.6), there exists a finitely generated flat  $R[U]$ -algebra  $D$  such that

- (a)  $D$  is an  $\mathbf{A}^2$ -fibration over  $R[U]$ .
- (b)  $D[1/U] = R[U, 1/U]^{[2]}$ .
- (c)  $A_1 \cong D \otimes_{R[U]} S_1$  and hence  $A \cong D \otimes_{R[U]} S$ .

By (c) it follows that Question (4.3) would have an affirmative answer if we can show that  $D = R[U]^{[2]}$ . Unfortunately in the above situation (i.e., if  $D$  is an  $R[U]$ -algebra over a d.v.r.  $R$  satisfying (a) and (b)) we even do not know whether  $D = R^{[3]}$  let alone being  $R[U]^{[2]}$ . So as a starting point we make the assumption that  $D = R^{[3]}$ . Note that the condition (a) is equivalent to

$$(a') \quad D_{\pi} = R_{\pi}[U]^{[2]} \text{ and } D/\pi D = (R/\pi R)[U]^{[2]}.$$

We are thereby asking the following question :

**Question 4.9.** Let  $R$  be a discrete valuation ring containing the field of rationals. Let  $\pi$  be a parameter of  $R$ ,  $K = R_{\pi}$  and  $k = R/\pi R$ . Let  $F \in R[X, Y, Z]$  be such that

- (i)  $K[X, Y, Z] = K[F]^{[2]}$ .
- (ii)  $k[X, Y, Z] = k[\overline{F}]^{[2]}$ .
- (iii)  $R[X, Y, Z, 1/F] = R[F, 1/F]^{[2]}$ .

Then is  $R[X, Y, Z] = R[F]^{[2]}$  ? (For a concrete example, see (4.13) below).

Note that by (4.1), the conditions (i) and (ii) together imply that  $R[X, Y, Z]/(F) = R^{[2]}$ . We are thus naturally led to the Question (4.4) raised earlier. Thus the  $\mathbf{A}^2$ -fibration problem over a two-dimensional regular  $k$ -spot involves a question of  $\mathbf{A}^2$ -fibration over  $R[U]$  for a d.v.r.  $R$  which in turn involves an epimorphism question over a d.v.r.. The Question (4.4) is still open in general. The authors investigated the case of linear planes over a d.v.r. and obtained the following result ([7, 3.5]):

**Theorem 4.10.** *Let  $R$  be a discrete valuation ring (of any characteristic) with parameter  $\pi$ . Let  $F \in R[X, Y, Z]$  be such that*

$$(i) \ R[X, Y, Z]/(F) = R^{[2]}.$$

$$(ii) \ F = f(X, Y)Z - g(X, Y) \text{ where } f, g \in R^{[2]} \text{ and } f(X, Y) \notin \pi R[X, Y].$$

*Then  $R[X, Y, Z] = R[F]^{[2]}$ .*

This result may also be viewed as a generalisation of A. Sathaye's theorem on linear planes over a field ([15]) stated below.

**Theorem 4.11.** *Let  $K$  be a field (of any characteristic) and  $F \in K[X, Y, Z]$  be such that*

$$(i) \ K[X, Y, Z]/(F) = K^{[2]}.$$

$$(ii) \ F = f(X, Y)Z - g(X, Y) \text{ where } f, g \in K^{[2]} \text{ and } f \neq 0.$$

*Then  $K[X, Y, Z] = K[F]^{[2]}$ .*

Note that in the situation of (4.4), if  $K$  is the quotient field of  $R$ , then we have  $K[X, Y, Z]/(F) = K^{[2]}$ . Thus to investigate (4.4) one would first ask if, for a field  $K$  of ch. 0, an element  $F \in K[X, Y, Z]$  satisfying  $K[X, Y, Z]/(F) = K^{[2]}$  is necessarily a variable in  $K[X, Y, Z]$ . The most general answer known so far is the following theorem of P. Russell and A. Sathaye ([14, 3.8.2]) :

**Theorem 4.12.** *Let  $K$  be a field of characteristic zero and let  $F \in K[X, Y, Z]$  be such that*

$$(i) \quad K[X, Y, Z]/(F) = K^{[2]}.$$

$$(ii) \quad F = \sum_{0 \leq i \leq n} f_i(X, Y)Z^i \text{ with } f_i \in K^{[2]} \text{ where g.c.d. } (f_1, \dots, f_n) \text{ is a non-unit in } K[X, Y].$$

Then  $K[X, Y, Z] = K[F]^{[2]}$ .

We conclude our discussion by giving a concrete non-trivial example of a linear plane over a d.v.r..

**Example 4.13.** Let  $(R, \pi)$  be a discrete valuation ring containing the field of rationals. Let  $K = R_\pi$  and  $k = R/\pi R$ . Define  $F, G, H \in R[X, Y, Z]$  as

$$F = (\pi Y^2)Z + Y + \pi Y(X + X^2) + \pi^2 X.$$

$$G = \pi X + Y(YZ + X + X^2).$$

$$H = \pi^2 Z - (YZ + X + X^2)(\pi(2X + 1) + Y(YZ + X + X^2)).$$

One can check that

$$(i) K[X, Y, Z] = K[F, G, H] (= K[F]^{[2]}).$$

$$(ii) k[X, Y, Z] = k[\overline{F}]^{[2]} \text{ (since } \overline{F} = Y).$$

$$(iii) R[X, Y, Z, 1/F] = R[F, 1/F, G]^{[1]} = R[F, 1/F]^{[2]}.$$

Note that by (i) and (ii) and Theorem (4.1),  $R[X, Y, Z]/(F) = R^{[2]}$ .

We end with the question

**Question 4.14.** In the above example, is  $R[X, Y, Z] = R[F]^{[2]}$  ?

## 5 References

1. S.S. Abhyankar and T.T. Moh, Embeddings of the line in the plane, *J. reine Angew. Math* **276** (1975), 148-166.
2. T. Asanuma, Polynomial fibre rings of algebras over noetherian rings, *Invent. Math.* **87** (1987), 101-127.
3. H. Bass, E.H. Connell and D.L. Wright, Locally polynomial algebras are symmetric algebras, *Invent. math.* **38** (1977), 279-299.
4. S.M. Bhatwadekar, Analytic isomorphism and category of finitely generated modules, *Communications in Algebra*, **16(9)**, (1988), 1949-1958.

5. S.M. Bhatwadekar, Generalized epimorphism theorem, *Proc. Indian Acad.Sci (Math.Sci.)*, **98** (1988), 109-116.
6. S.M. Bhatwadekar and A.K. Dutta, On Residual Variables and stably Polynomial Algebras, *Communications in Algebra*, **21(2)**, (1993), 635-645.
7. S.M. Bhatwadekar and A.K. Dutta, Linear planes over a D.V.R., to appear in the *Journal of Algebra*.
8. S.M. Bhatwadekar and A.K. Dutta, On  $\mathbf{A}^1$ -fibrations of  $R$ -subalgebras of  $R[X_1, \dots, X_n]$ , Preprint.
9. I.V. Dolgachev and B. Weisfeiler, Unipotent group schemes over integral rings, Eng. translation of *Izv. Akad. Nauk SSSR, Ser. Mat. Tom.* **38** (1974), 757-799.
10. E. Hamann, On the  $R$ -invariance of  $R[X]$ , *J. Algebra* **35** (1975), 1-16.
11. H. Lindel, On the Bass-Quillen Conjecture concerning projective modules over polynomial rings, *Invent. math.* **65** (1981), 319-323.
12. M.P. Murthy, Projective  $A[X]$ -modules, *J. London Math. Soc.* **41** (1966), 453-456.
13. D. Quillen, Projective modules over polynomial rings, *Invent. Math.* **36** (1976), 167-171.



14. P. Russell and A. Sathaye, On finding and cancelling variables in  $k[X, Y, Z]$ , *J. Algebra* **57** (1979), 153-166.
15. A. Sathaye, On Linear Planes, *Proc. Amer. Math. Soc.* **56** (1976), 1-7.
16. A. Sathaye, Polynomial Ring in Two Variables over a D.V.R. : A Criterion, *Invent. math.* **74** (1983), 159-168.
17. V. Srinivas, Vector bundles on the cone over a curve, *Compositio Math.* **47** (1982), 249-269.
18. A. Suslin, Projective modules over a polynomial ring are free, *Soviet Math. Doklady*, **17** (1976), 1160-1164 (English translation).
19. R.G. Swan, On seminormality, *J. Algebra* **67** (1980), 210-229.
20. J. Yanik, Projective Algebras, *J. Pure and Applied Algebra* **21** (1981), 339-358.
